# Supplementary material
Source: Springer Nature journal article supplement (https://www.springermedizin.de/resource/supplementary/13033_2012_124_MOESM4_ESM.pdf/9651918)

**a**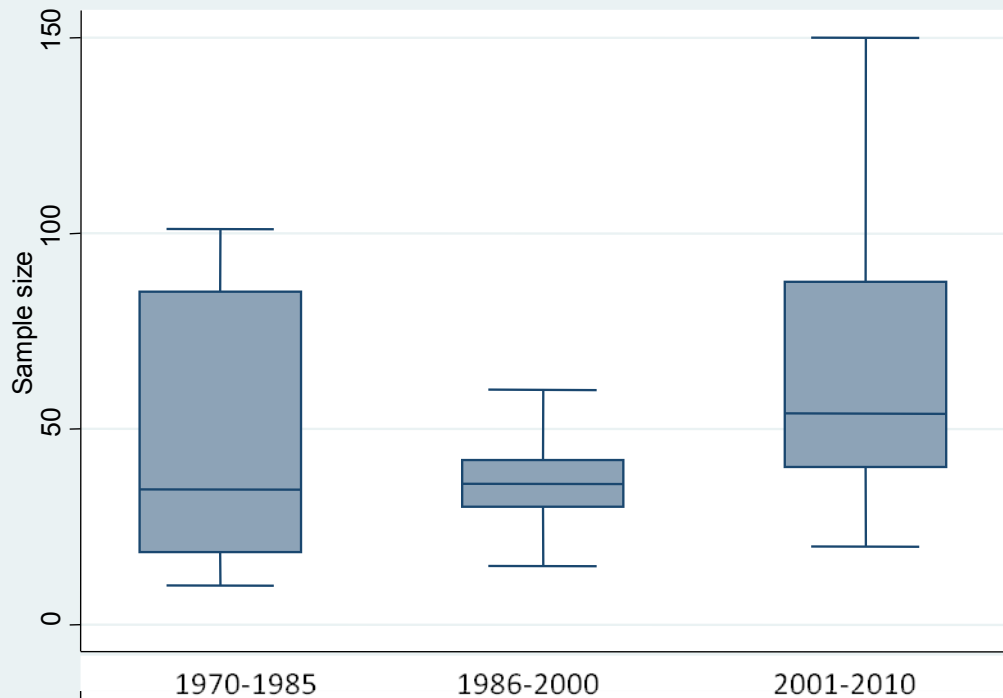**b**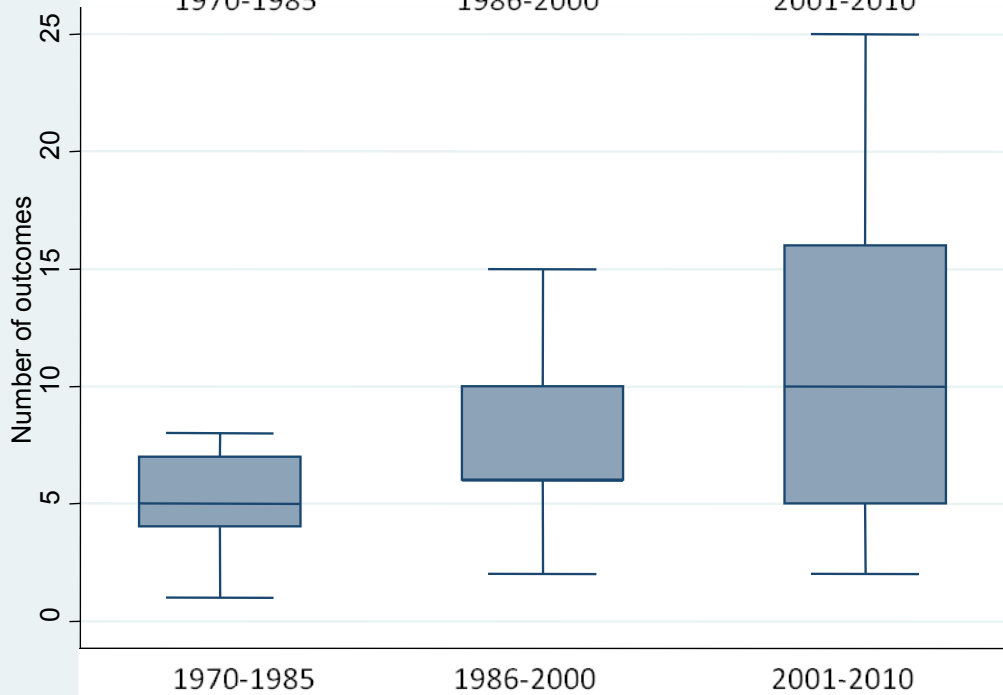

**a**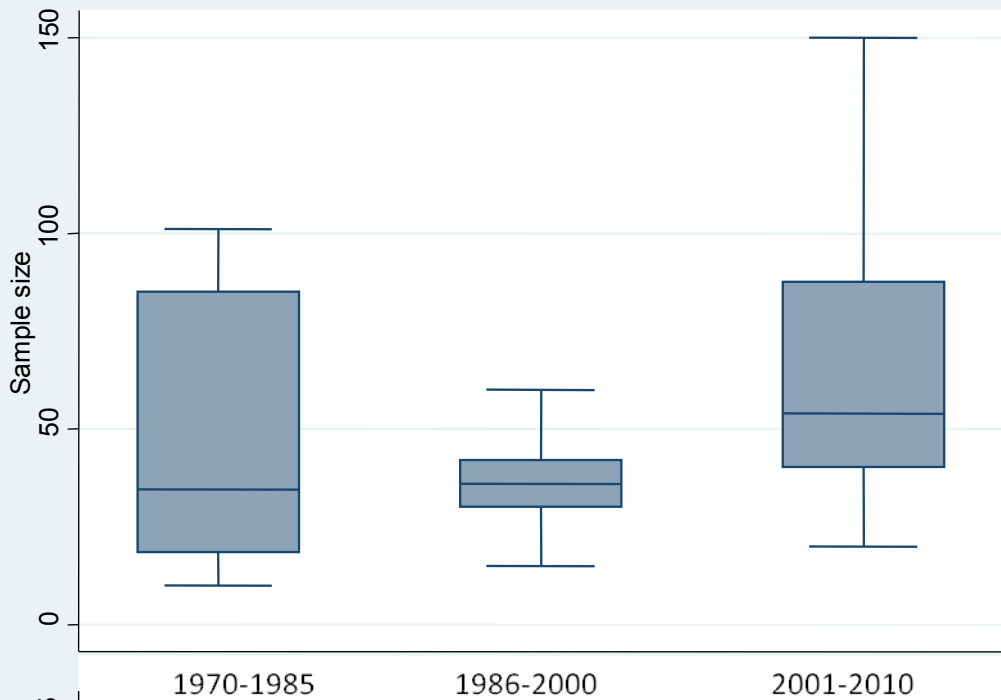**b**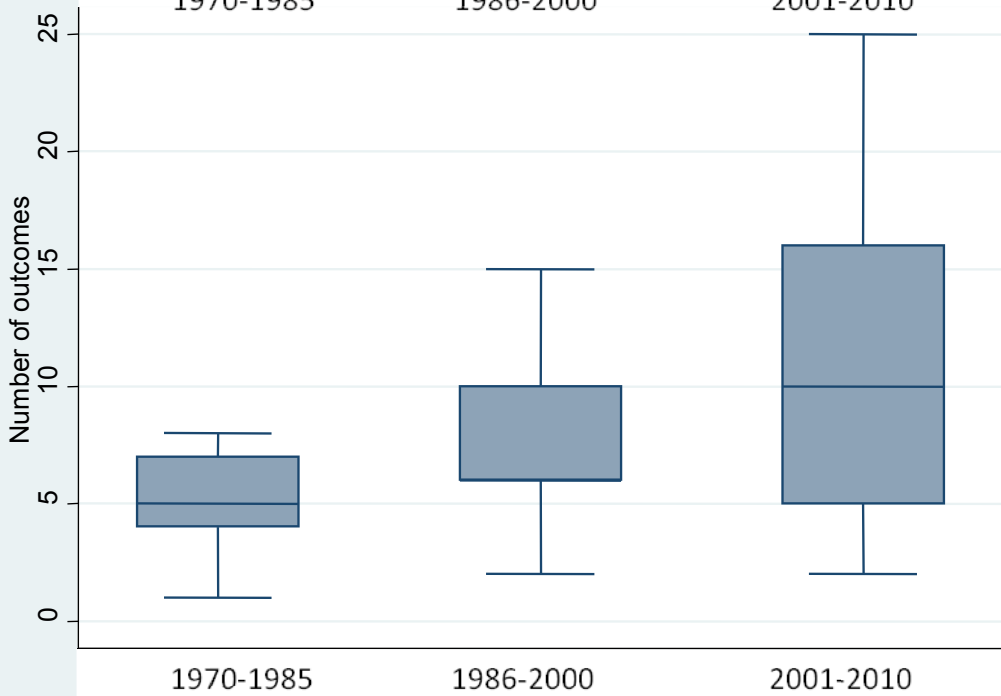

Supplement: MOESM4 [file 9651918]
